# Supplementary material for: Thermally activated delayed fluorescence and mechanochromism in napthalimide-azatriangulenes
Source: Royal Society of Chemistry journal article supplement (doi:10.1039/d3tc02407e), 2023-01-01
Supplement: d3tc02407e1.pdf [file d3tc02407e1.pdf]

## Supporting Information for

### **Thermally Activated Delayed Fluorescence and Mechanochromism in Naphthalimide-Azatriangulenes**

By Seja A. Elgadi<sup>†</sup>, Arwen Y. Cai<sup>†</sup>, and Zachary M. Hudson\*

*Department of Chemistry, The University of British Columbia, 2036 Main Mall, Vancouver, British Columbia, Canada, V6T 1Z1.*

*Tel: +1-604-822-3266; Fax: +1-604-822-2847; e-mail: zhudson@chem.ubc.ca.*

<sup>†</sup> *These authors contributed equally to this work.*

#### **Table of Contents**

|                                                                       |    |
|-----------------------------------------------------------------------|----|
| Experimental Details.....                                             | 2  |
| Synthetic Schemes .....                                               | 3  |
| Synthetic Procedures.....                                             | 4  |
| <sup>1</sup> H and <sup>13</sup> C{ <sup>1</sup> H} NMR Spectra ..... | 6  |
| X-ray Crystallography .....                                           | 14 |
| Photophysical Characterization .....                                  | 11 |
| Thermal and Electrochemical Characterization.....                     | 17 |
| Density Functional Theory .....                                       | 18 |
| References.....                                                       | 22 |

## Experimental Details

**General Considerations.** All reactions and manipulations were carried out under a nitrogen atmosphere using standard Schlenk or glove box techniques unless otherwise stated. Dry and degassed toluene and tetrahydrofuran were obtained from Caledon Laboratories, dried using an Innovative Technologies Inc. solvent purification system. 1,4-dioxane was dried over 4 Å molecular sieves. All reagents were obtained from Sigma-Aldrich, TCI America, Pressure Chemical, or Oakwood Chemical, and used as received unless otherwise stated. SMAT-Br, HMAT-Br, OMAT, and NAI-Br were prepared according to literature procedures.<sup>1-4</sup> The <sup>1</sup>H and <sup>13</sup>C{<sup>1</sup>H} nuclear magnetic resonance (NMR) spectra were measured on a Bruker AV III HD 400 MHz spectrometer with chloroform-*d* (CDCl<sub>3</sub>), dichloromethane-*d*<sub>2</sub> (CD<sub>2</sub>Cl<sub>2</sub>), or dimethylsulfoxide-*d*<sub>6</sub> (DMSO-*d*<sub>6</sub>) as the solvent. Mass spectra were recorded on a Bruker HCTultra PTM Discovery System using electrospray ionization (ESI).

**General Photophysical Characterization.** Absorbance measurements were made on a Cary 60 spectrometer and fluorescence measurements were made on an Edinburgh Instruments FS5 spectrofluorometer or Edinburgh Instruments FLS1000 spectrofluorometer. Concentrations of 0.01 mg mL<sup>-1</sup> were used unless otherwise stated. Absolute photoluminescence quantum yields were determined using an Edinburgh Instruments SC-30 Integrating Sphere Module, with optical densities less than 0.1. Lifetimes were obtained using an Edinburgh Instruments EPLED source ( $\lambda_{\text{exc}} = 380$  nm) coupled with time-correlated single-photon counting (TCSPC), or a Xe  $\mu$ F lamp coupled with multichannel scaling (MCS). All samples were excited at the maximum of the lowest energy absorption band and lifetimes were measured at the fluorescence maximum unless otherwise specified.

**Electrochemical Methods.** Cyclic voltammograms were recorded using a BASi Epsilon Eclipse potentiostat at room temperature using a standard three-electrode configuration (working electrode: 3 mm diameter glassy carbon; reference electrode: RE-5B Ag/AgCl electrode in saturated aqueous KCl (BASi Inc.), referenced externally to ferrocene/ferrocenium, counter electrode: Pt wire) in 0.2 M tetrabutylammonium hexafluorophosphate in *o*-difluorobenzene. Experiments were run at a scan rate of 50 mV s<sup>-1</sup> in degassed electrolyte solution with 1.0  $\mu$ mol mL<sup>-1</sup> of analyte.

**Density Functional Theory.** Quantum mechanical calculations were performed using the Gaussian 16 Rev. B.01 computational package using default settings unless otherwise stated. All geometries were optimized to a minimum, and frequency calculations were performed at the same level of theory to verify the absence of imaginary frequencies. Initial geometry optimizations were conducted at the B3LYP/6-31+g(d) level. Vertical excitation (absorption) energies of the lowest singlet and triplet excited states were calculated by the Tamm–Dancoff approximation (TDA) scheme of time-dependent DFT (TDA-TDDFT) at the B3LYP/6-31+g(d) level in toluene using the polarizable continuum model (PCM). The GD3BJ empirical dispersion correction was used in all calculations.

## Synthetic Schemes

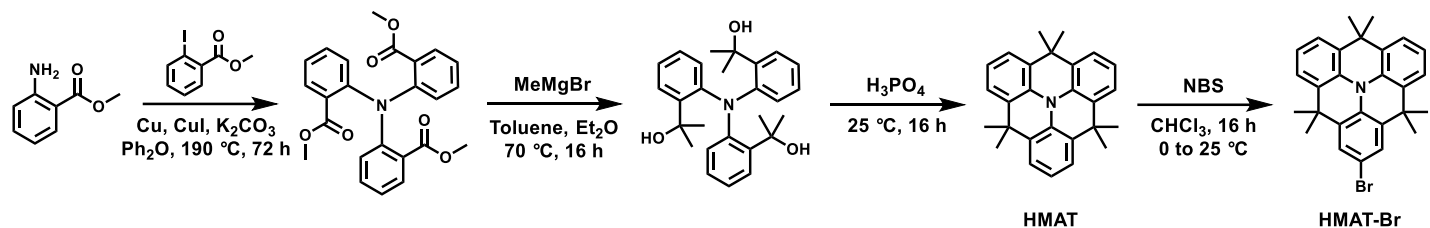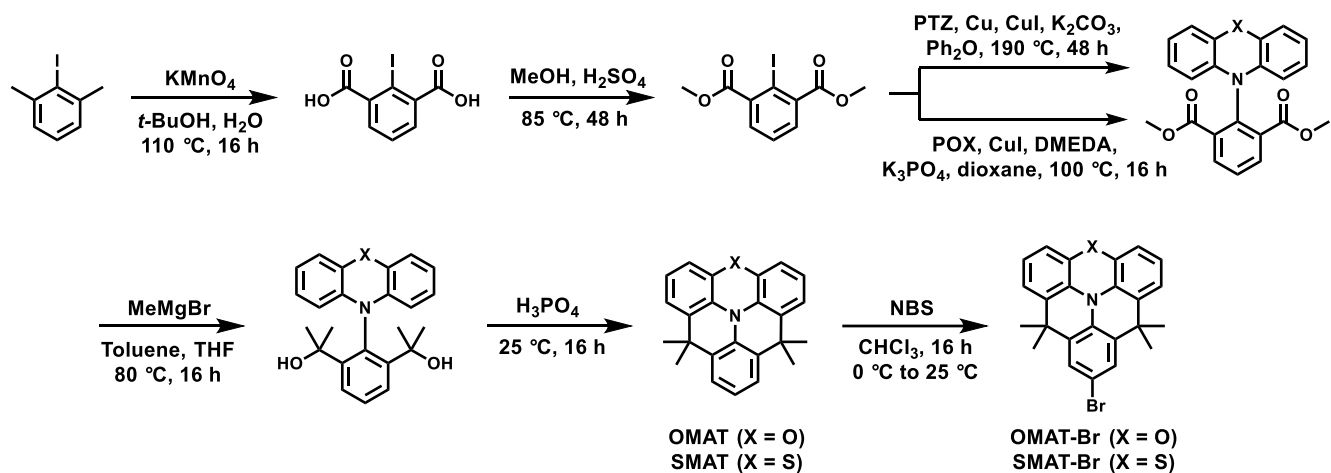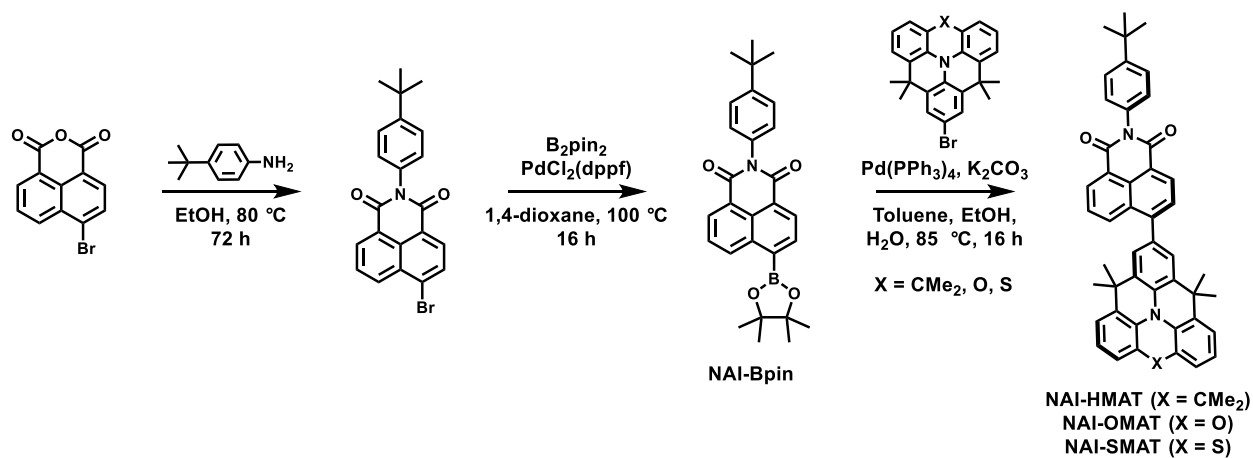

## Synthetic Procedures

### OMAT-Br

A 50 mL round bottom flask was charged with **OMAT** (266 mg, 0.784 mmol) which was dissolved in 15 mL  $\text{CHCl}_3$  and cooled to 0 °C in an ice bath. The flask was covered with aluminum foil and *N*-bromosuccinimide (140 mg, 0.786 mmol, 1 equiv.) was dissolved in 8 mL  $\text{CHCl}_3$  and added to the reaction dropwise with a Pasteur pipette. Subsequently, the ice bath was removed, and the reaction was allowed to warm to room temperature and proceed for 16 hours. After completion, the reaction was quenched with saturated aqueous  $\text{Na}_2\text{S}_2\text{O}_3$  (50 mL) and the mixture was extracted with dichloromethane ( $3 \times 50$  mL). The combined organics were washed with deionized water (80 mL) and saturated brine (50 mL) then dried over anhydrous  $\text{MgSO}_4$  and evaporated under reduced pressure. The resulting brown residue was purified by silica column chromatography using a gradient of hexanes to 2% toluene, 98% hexanes. Yield: white solid, 225 mg, 69%.  $^1\text{H}$  NMR (400 MHz,  $\text{DMSO}-d_6$ )  $\delta$  7.53 (s, 2H), 7.11 (d,  $J = 7.0$  Hz, 2H), 6.90 (t,  $J = 7.9$  Hz, 2H), 6.67 (d,  $J = 7.8$  Hz, 2H), 1.57 ppm (s, 12H).  $^{13}\text{C}$  NMR (101 MHz,  $\text{DMSO}-d_6$ )  $\delta$  140.9, 130.6, 129.6, 127.9, 127.4, 124.0, 122.3, 121.3, 114.6, 113.5, 35.2, 33.2 ppm. HRMS (ESI)  $m/z$ :  $[\text{M}]^+ \bullet$  calcd for  $[\text{C}_{24}\text{H}_{20}\text{BrNO}]^+$ , 417.0728; found, 417.0730; difference: 0.44 ppm.

### NAI-Bpin

A dry 100 mL Schlenk flask was charged with **NAI-Br** (1.000 g, 2.45 mmol),  $\text{B}_2\text{Pin}_2$  (933 mg, 3.67 mmol, 1.5 equiv.), KOAc (721 mg, 7.35 mmol, 3 equiv.), and  $\text{PdCl}_2(\text{dppf})$  (90 mg, 0.12 mmol, 0.05 equiv.) in an  $\text{N}_2$  atmosphere. Dry dioxane (30 mL) was transferred into the reaction flask by cannula and the mixture was degassed by sparging with  $\text{N}_2$  gas while stirring for 10 mins. The reaction was heated to 90 °C for 16 hours before being taken off heat and diluted with  $\text{CH}_2\text{Cl}_2$  (150 mL). The dark brown solution was washed with water ( $3 \times 100$  mL) and saturated brine ( $1 \times 100$  mL). The organic layer was dried over anhydrous  $\text{MgSO}_4$  and evaporated under reduced pressure to yield a dark brown solid. The crude product was purified by silica column chromatography using a gradient of 40%  $\text{CH}_2\text{Cl}_2$ , 60% hexanes to  $\text{CH}_2\text{Cl}_2$ . Yield: Pale yellow solid, 423 mg, 38%.  $^1\text{H}$  NMR (400 MHz, Methylene Chloride- $d_2$ )  $\delta$  9.20 (d,  $J = 8.4$  Hz, 1H), 8.64 – 8.52 (m, 2H), 8.32 (d,  $J = 7.2$  Hz, 1H), 7.83 (t,  $J = 7.8$  Hz, 1H), 7.59 (d,  $J = 8.3$  Hz, 2H), 7.23 (d,  $J = 8.3$  Hz, 2H), 1.46 (s, 12H), 1.42 ppm (s, 9H).  $^{13}\text{C}$  NMR (75 MHz, Chloroform- $d$ )  $\delta$  164.74, 164.70, 151.5, 136.0, 135.6, 135.4, 132.7, 131.4, 130.3, 128.4, 128.1, 127.3, 126.6, 125.1, 122.9, 84.8, 34.9, 31.5, 25.1 ppm (quaternary carbon next to B was not visible). HRMS (ESI)  $m/z$ :  $[\text{M}]^+ \bullet$  calcd for  $[\text{C}_{28}\text{H}_{30}\text{BNO}_4]^+$ , 454.2304; found, 454.2311; difference: 1.39 ppm.

### NAI-HMAT

A dry 100 mL Schlenk flask was charged with **HMAT-Br** (124 mg, 0.279 mmol), **NAI-Bpin** (140 mg, 0.307 mmol, 1.1 equiv.),  $\text{Na}_2\text{CO}_3$  (150 mg, 1.42 mmol, 5 equiv.), and  $\text{Pd}(\text{PPh}_3)_4$  (10 mg, 0.0087 mmol, 0.03 equiv.) under a  $\text{N}_2$  atmosphere. In a separate 50 mL round bottom flask, toluene (9 mL), ethanol (3 mL), and deionized water (1 mL) were sparged with  $\text{N}_2$  gas for 30 minutes with vigorous stirring before being transferred into the reaction flask by cannula. The reaction was heated to 75 °C in an oil bath for 16 hours. After completion by TLC, the reaction was diluted with deionized water (50 mL) and the reaction mixture was extracted with dichloromethane ( $3 \times 70$  mL). The combined organics were washed with deionized water (70 mL) and saturated brine (70 mL) before being dried over anhydrous  $\text{MgSO}_4$  and evaporated under reduced pressure. The resulting solid was purified by silica column chromatography using toluene. Yield: orange solid,

142 mg, 73%.  $^1\text{H}$  NMR (400 MHz,  $\text{DMSO-}d_6$ )  $\delta$  8.62 – 8.52 (m, 2H), 8.43 (dd,  $J$  = 8.5, 1.1 Hz, 1H), 8.00 (d,  $J$  = 7.6 Hz, 1H), 7.90 (dd,  $J$  = 8.6, 7.2 Hz, 1H), 7.66 (s, 2H), 7.56 (d,  $J$  = 8.5 Hz, 2H), 7.50 (d,  $J$  = 7.7 Hz, 4H), 7.32 (d,  $J$  = 8.5 Hz, 2H), 7.20 (t,  $J$  = 7.7 Hz, 2H), 1.66 (s, 12H), 1.62 (s, 6H), 1.38 ppm (s, 9H).  $^{13}\text{C}$  NMR (101 MHz, Methylene Chloride- $d_2$ )  $\delta$  165.1, 164.9, 152.2, 148.1, 133.9, 133.7, 133.5, 133.1, 132.2, 131.8, 131.6, 131.0, 130.8, 130.4, 129.9, 128.9, 128.1, 127.4, 126.8, 125.8, 124.5, 124.2, 123.9, 123.8, 122.1, 36.2, 36.1, 35.3, 33.7, 33.4, 31.7 ppm. HRMS (ESI)  $m/z$ :  $[\text{M}]^{+\bullet}$  calcd for  $[\text{C}_{49}\text{H}_{44}\text{N}_2\text{O}_2]^{+\bullet}$ , 692.3403; found, 692.3405; difference: 0.33 ppm.

### NAI-OMAT

A dry 100 mL Schlenk flask was charged with **NAI-Bpin** (60 mg, 0.132 mmol), **OMAT-Br** (61 mg, 0.145 mmol, 1.1 equiv.),  $\text{Na}_2\text{CO}_3$  (70 mg, 0.66 mmol, 5 equiv.), and  $\text{Pd}(\text{PPh}_3)_4$  (5 mg, 0.0043 mmol, 0.03 equiv.) under a  $\text{N}_2$  atmosphere. In a separate 50 mL round bottom flask, toluene (9 mL), ethanol (3 mL), and deionized water (1 mL) were sparged with  $\text{N}_2$  gas for 30 minutes with vigorous stirring before being transferred into the reaction flask by cannula. The reaction was heated to 75 °C in an oil bath for 16 hours. After completion by TLC, the reaction was diluted with deionized water (50 mL) and the reaction mixture was extracted with dichloromethane ( $3 \times 70$  mL). The combined organics were washed with deionized water (70 mL) and saturated brine (70 mL) before being dried over anhydrous  $\text{MgSO}_4$  and evaporated under reduced pressure. The resulting solid was purified by silica column chromatography using 80% toluene, 20%  $\text{CHCl}_3$ . Yield: orange solid, 53 mg, 60 %.  $^1\text{H}$  NMR (400 MHz,  $\text{DMSO-}d_6$ )  $\delta$  8.56 (d,  $J$  = 7.5 Hz, 2H), 8.39 (d,  $J$  = 8.3 Hz, 1H), 7.99 – 7.88 (m, 2H), 7.63 (s, 2H), 7.56 (d,  $J$  = 8.5 Hz, 2H), 7.32 (d,  $J$  = 8.4 Hz, 2H), 7.18 (d,  $J$  = 8.0 Hz, 2H), 6.95 (t,  $J$  = 7.9 Hz, 2H), 6.73 (d,  $J$  = 6.7 Hz, 2H), 1.68 (s, 12H), 1.38 ppm (s, 9H).  $^{13}\text{C}$  NMR (101 MHz, Methylene Chloride- $d_2$ )  $\delta$  165.1, 164.9, 152.2, 147.9, 142.6, 133.9, 133.5, 133.2, 131.8, 131.6, 130.9, 130.8, 130.5, 129.9, 129.4, 128.9, 128.1, 127.4, 126.9, 126.8, 124.4, 123.9, 123.8, 122.1, 121.4, 114.1, 36.1, 35.3, 33.9, 31.7 ppm. HRMS (ESI)  $m/z$ :  $[\text{M}]^{+\bullet}$  calcd for  $[\text{C}_{46}\text{H}_{38}\text{N}_2\text{O}_3]^{+\bullet}$ , 666.2882; found, 666.2882; difference: -0.11 ppm.

### NAI-SMAT

A dry 100 mL Schlenk flask was charged with **NAI-Bpin** (200 mg, 0.439 mmol), **SMAT-Br** (210 mg, 0.483 mmol, 1.1 equiv.),  $\text{Na}_2\text{CO}_3$  (233 mg, 2.20 mmol, 5 equiv.), and  $\text{Pd}(\text{PPh}_3)_4$  (15 mg, 0.013 mmol, 0.03 equiv.) under a  $\text{N}_2$  atmosphere. In a separate 50 mL round bottom flask, toluene (9 mL), ethanol (3 mL), and deionized water (1 mL) were sparged with  $\text{N}_2$  gas for 30 minutes with vigorous stirring before being transferred into the reaction flask by cannula. The reaction was heated to 75 °C in an oil bath for 16 hours. After completion by TLC, the reaction was diluted with deionized water (50 mL) and the reaction mixture was extracted with dichloromethane ( $3 \times 70$  mL). The combined organics were washed with deionized water (70 mL) and saturated brine (70 mL) before being dried over anhydrous  $\text{MgSO}_4$  and evaporated under reduced pressure. The resulting solid was purified by silica column chromatography using toluene. Yield: orange solid, 227 mg, 76 %.  $^1\text{H}$  NMR (400 MHz,  $\text{DMSO-}d_6$ )  $\delta$  8.64 – 8.48 (m, 2H), 8.39 (d,  $J$  = 9.1 Hz, 1H), 7.99 (d,  $J$  = 7.6 Hz, 1H), 7.91 (t,  $J$  = 7.4 Hz, 1H), 7.64 (s, 2H), 7.56 (d,  $J$  = 8.5 Hz, 2H), 7.43 – 7.27 (m, 4H), 7.05 (t,  $J$  = 7.6 Hz, 2H), 6.92 (dd,  $J$  = 7.5, 1.5 Hz, 2H), 1.63 (s, 12H), 1.38 ppm (s, 9H).  $^{13}\text{C}$  NMR (101 MHz, Methylene Chloride- $d_2$ )  $\delta$  165.1, 164.9, 152.2, 147.7, 134.3, 133.9, 133.5, 132.8, 131.8, 131.6, 131.5, 130.9, 130.6, 129.8, 128.8, 128.2, 127.4, 126.8, 125.7, 125.2, 124.9, 123.8, 122.2, 117.1, 36.1, 35.3, 33.1, 31.7 ppm. HRMS (ESI)  $m/z$ :  $[\text{M}]^{+\bullet}$  calcd for  $[\text{C}_{46}\text{H}_{38}\text{N}_2\text{O}_2\text{S}]^{+\bullet}$ , 682.2654; found, 682.2654; difference: -0.73 ppm.

# $^1\text{H}$ and $^{13}\text{C}\{^1\text{H}\}$ NMR Spectra

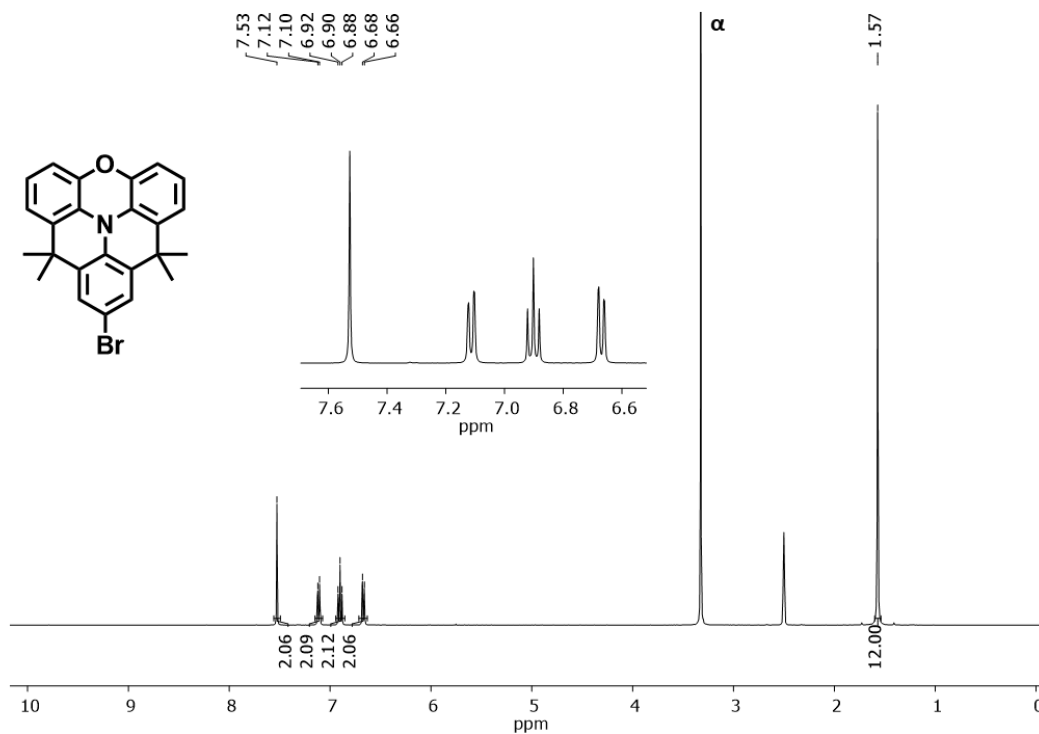

**Figure S1.**  $^1\text{H}$  NMR (400 MHz, 25 °C) of OMAT-Br in DMSO- $d_6$  ( $\alpha$ : H $_2$ O).

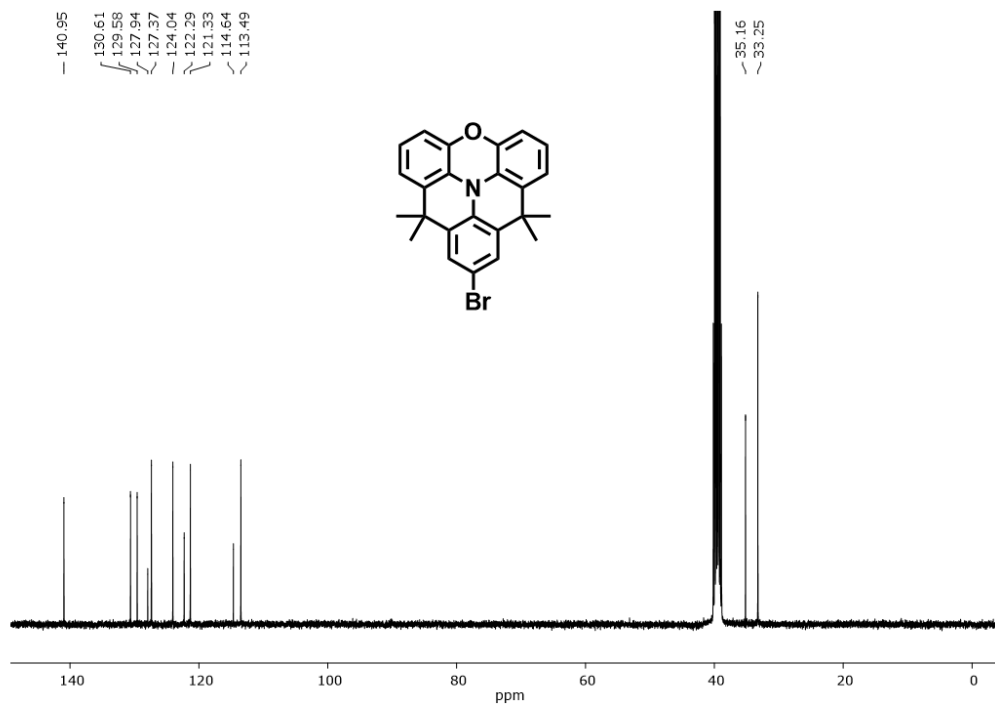

**Figure S2.**  $^{13}\text{C}\{^1\text{H}\}$  NMR (101 MHz, 25 °C) of OMAT-Br in DMSO- $d_6$ .

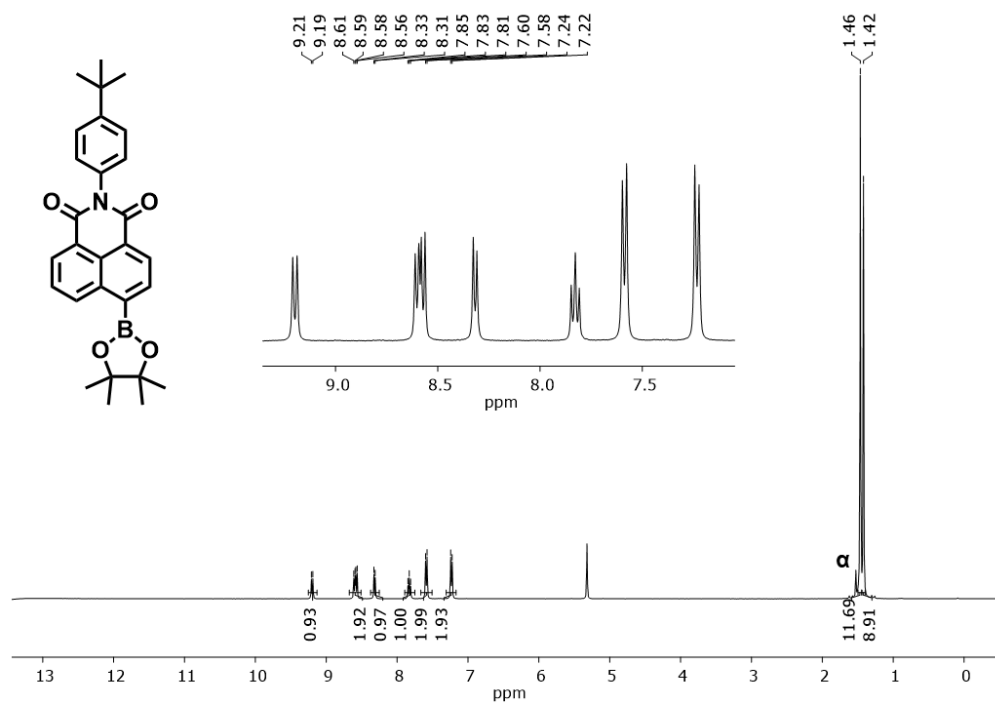

**Figure S3.** <sup>1</sup>H NMR (400 MHz, 25 °C) of NAI-Bpin in CD<sub>2</sub>Cl<sub>2</sub> (α: H<sub>2</sub>O).

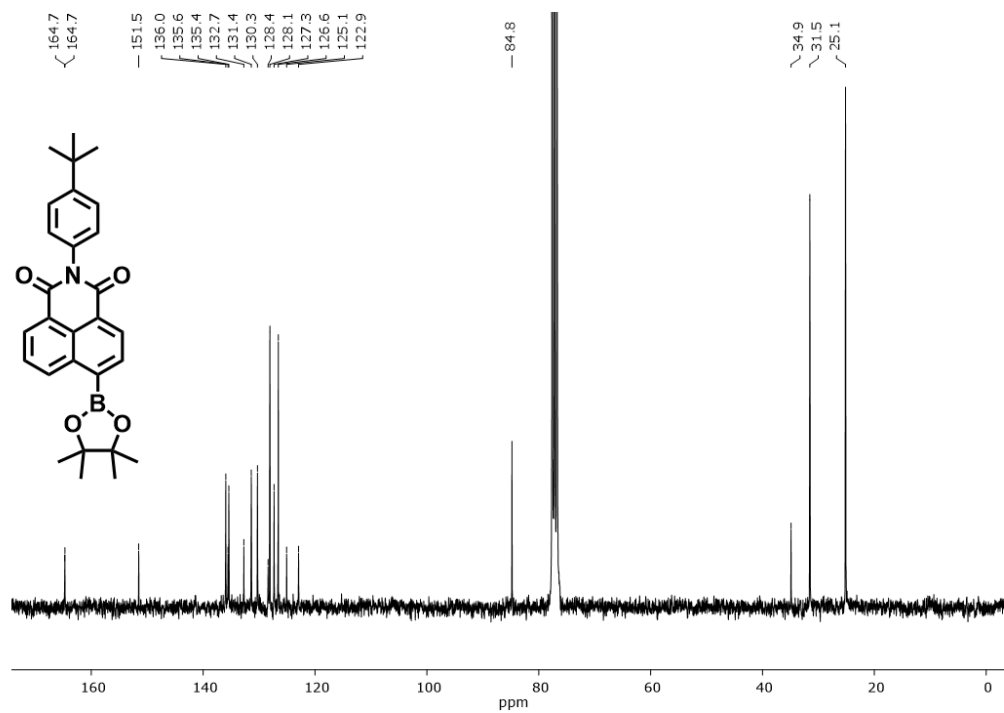

**Figure S4.** <sup>13</sup>C{<sup>1</sup>H} NMR (75 MHz, 25 °C) of NAI-Bpin in CDCl<sub>3</sub>.

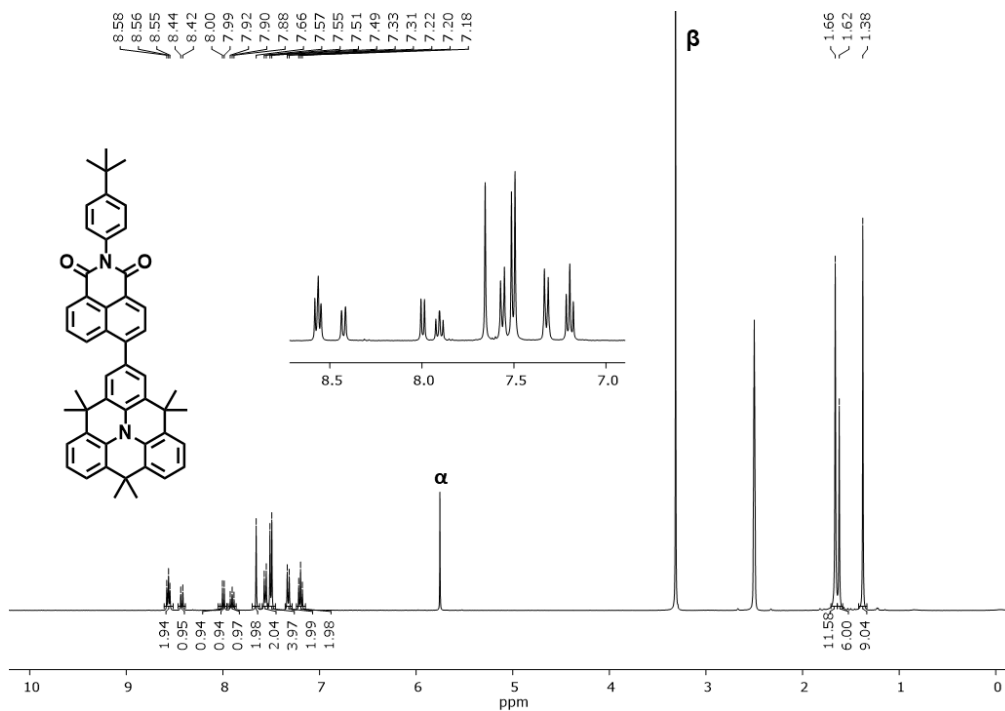

**Figure S5.** <sup>1</sup>H NMR (400 MHz, 25 °C) of **NAI-HMAT** in DMSO-*d*<sub>6</sub> (α: CH<sub>2</sub>Cl<sub>2</sub>, β: H<sub>2</sub>O).

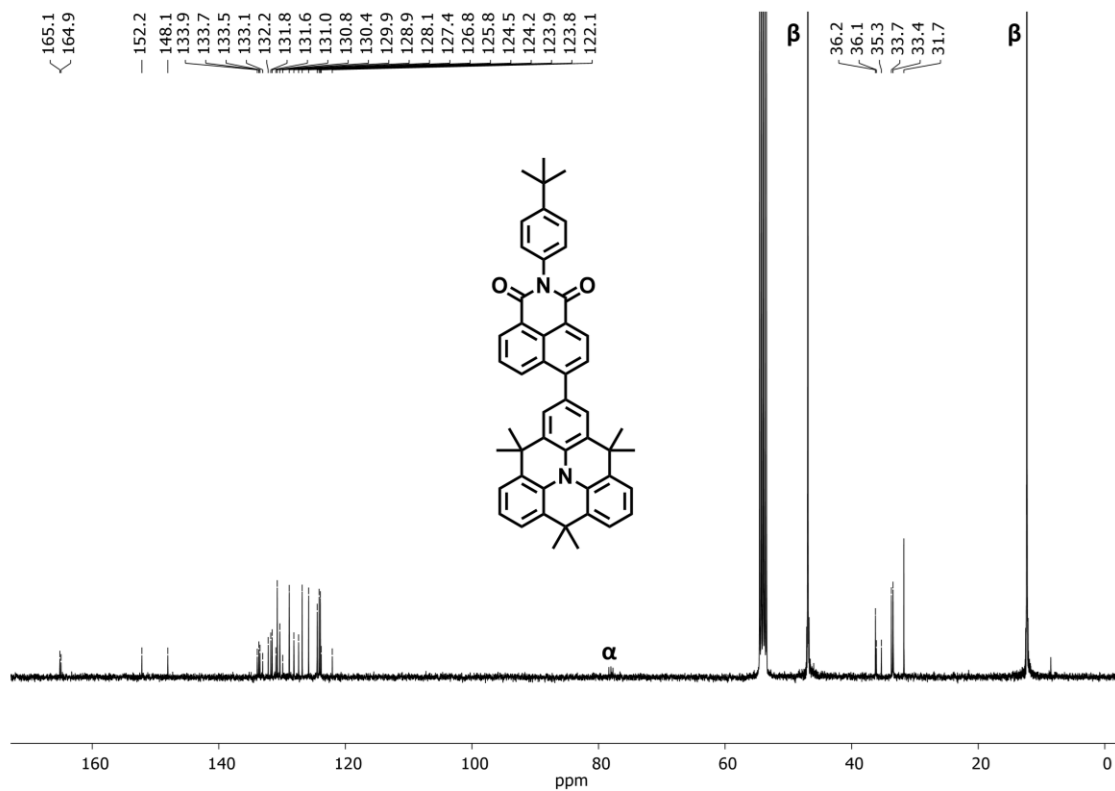

**Figure S6.** <sup>13</sup>C{<sup>1</sup>H} NMR (101 MHz, 25 °C) of **NAI-HMAT** in CD<sub>2</sub>Cl<sub>2</sub> with a drop of NEt<sub>3</sub> (α: CHCl<sub>3</sub>, β: NEt<sub>3</sub>).



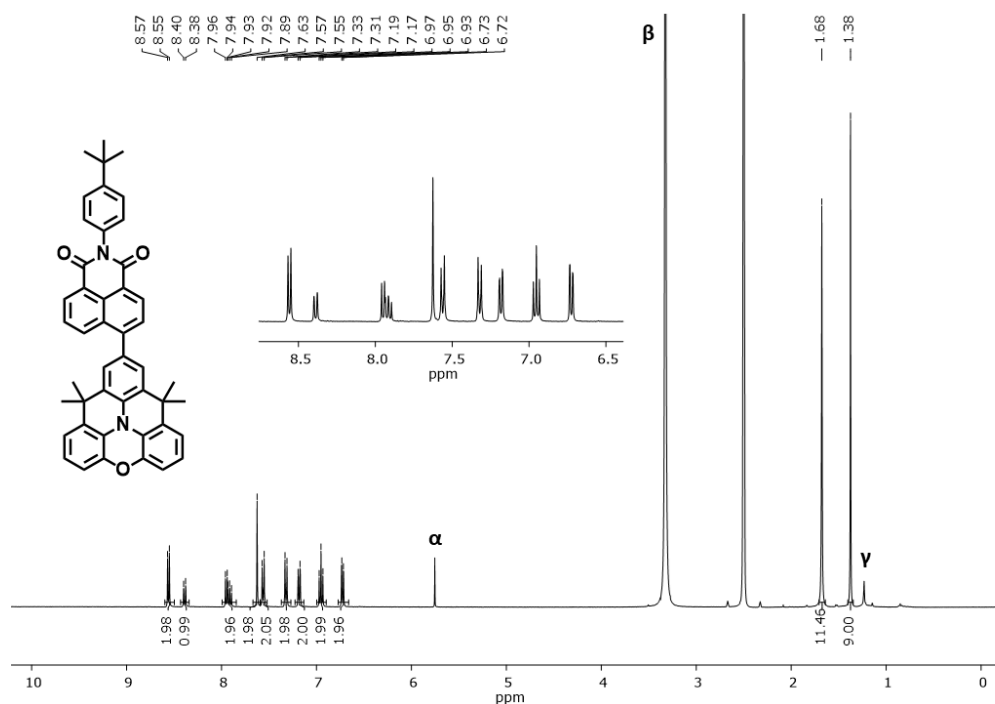

**Figure S7.** <sup>1</sup>H NMR (400 MHz, 25 °C) of **NAI-OMAT** in DMSO-*d*<sub>6</sub> (α: CH<sub>2</sub>Cl<sub>2</sub>, β: H<sub>2</sub>O, γ: hexanes).

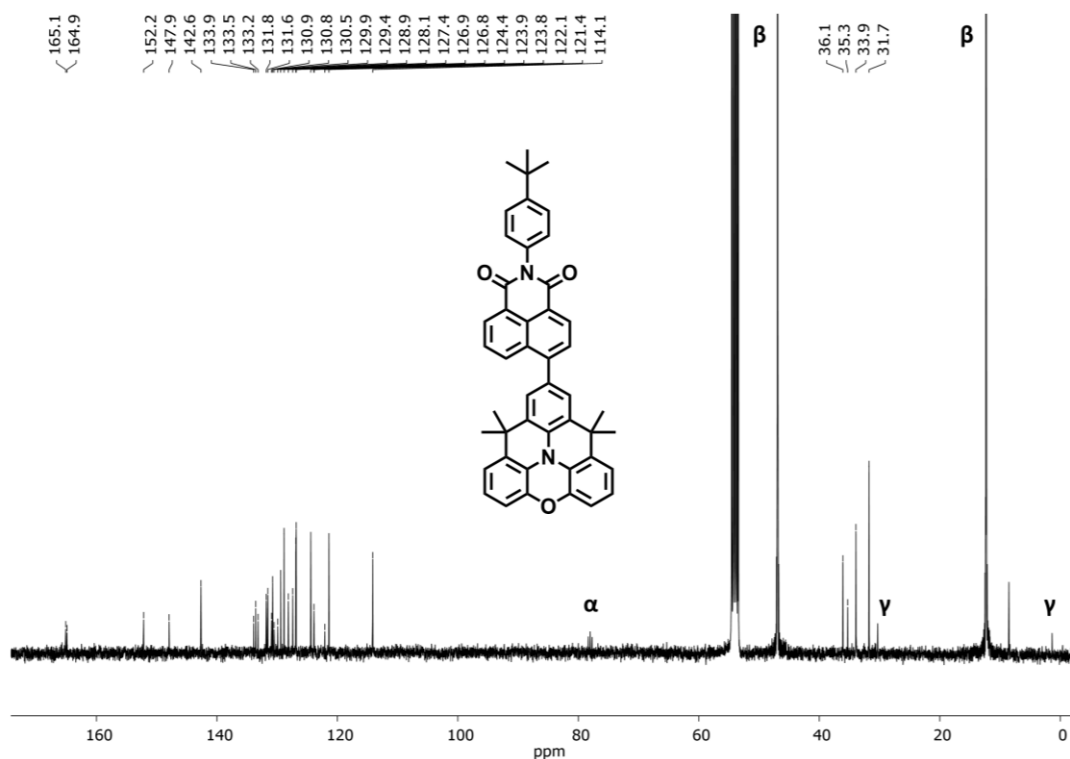

**Figure S8.** <sup>13</sup>C{<sup>1</sup>H} NMR (101 MHz, 25 °C) of **NAI-OMAT** in CD<sub>2</sub>Cl<sub>2</sub> with a drop of NEt<sub>3</sub> (α: CHCl<sub>3</sub>, β: NEt<sub>3</sub>, γ: grease).

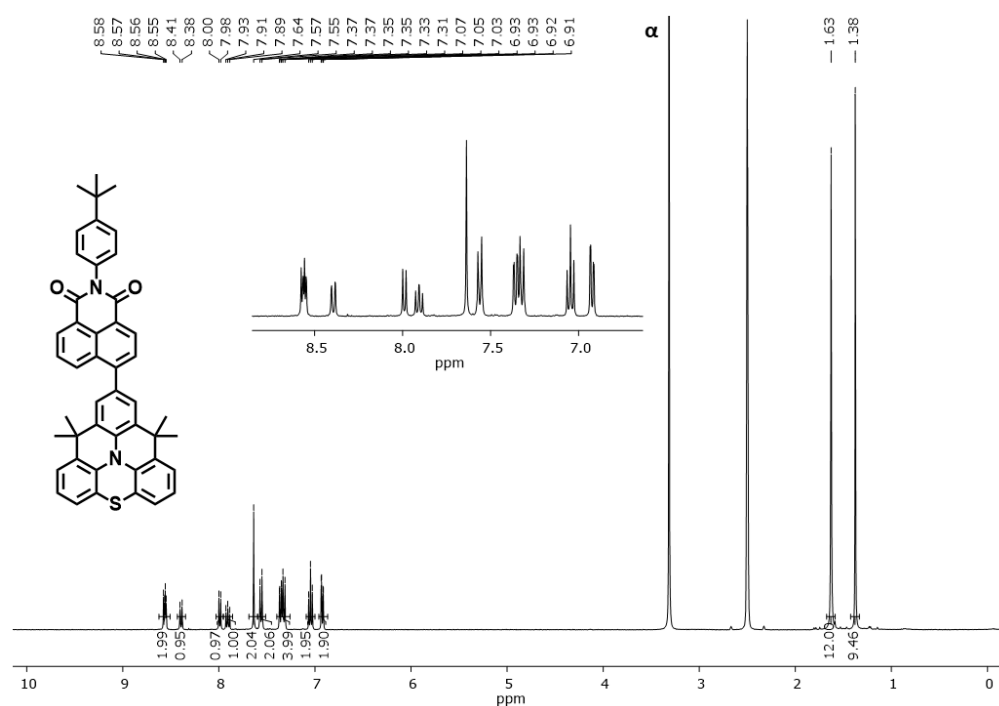

**Figure S9.**  $^1\text{H}$  NMR (400 MHz, 25 °C) of NAI-SMAT in  $\text{DMSO}-d_6$  ( $\alpha$ :  $\text{H}_2\text{O}$ ).

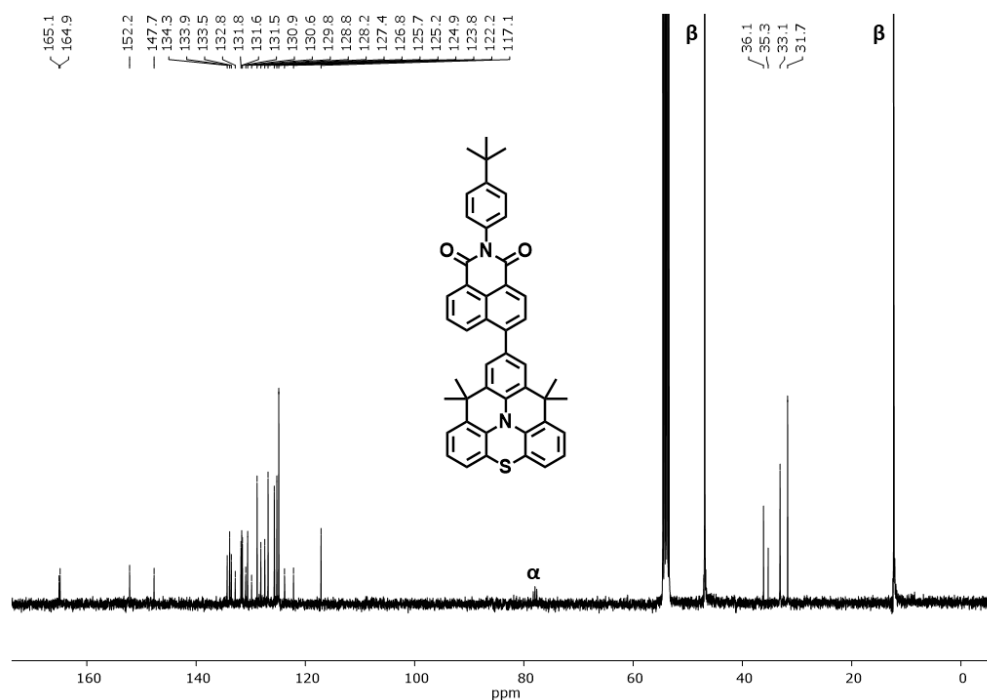

**Figure S10.**  $^{13}\text{C}\{^1\text{H}\}$  NMR (101 MHz, 25 °C) of NAI-SMAT in  $\text{CD}_2\text{Cl}_2$  with a drop of  $\text{NEt}_3$  ( $\alpha$ :  $\text{CHCl}_3$ ,  $\beta$ :  $\text{NEt}_3$ ).

## Photophysical Characterization

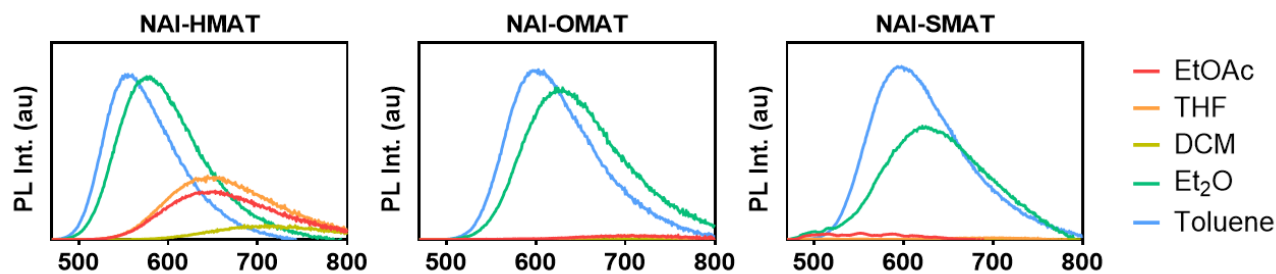

**Figure S11.** Emission spectra in solvents of varying polarity. Measured at concentrations of  $1.0 \times 10^{-2}$  mg mL<sup>-1</sup>.

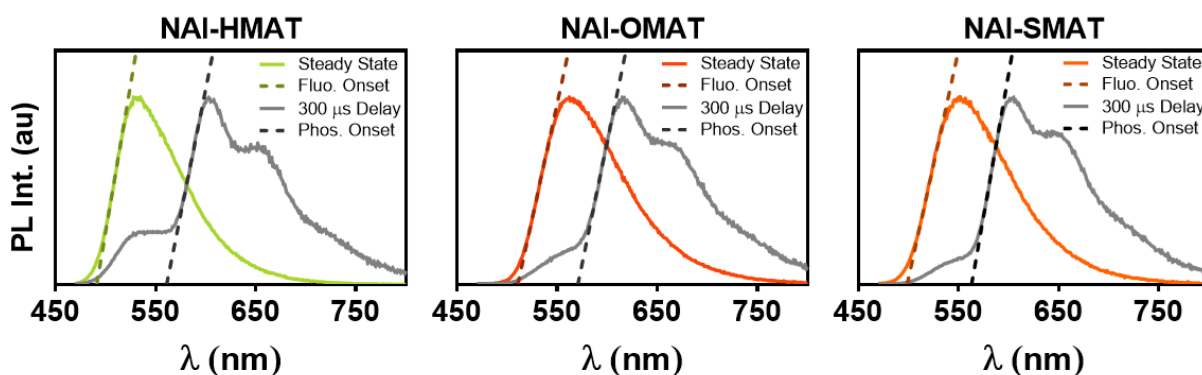

**Figure S12.** Steady-state fluorescence (coloured) and time-gated phosphorescence (gray) spectra measured at 77K, with corresponding linear onset fits. Samples were measured at  $1.0 \times 10^{-2}$  mg mL<sup>-1</sup> in 2-methyltetrahydrofuran.

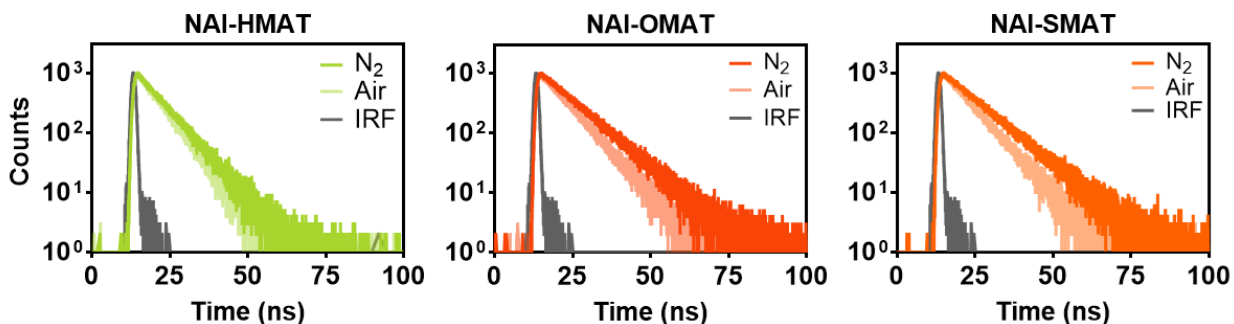

**Figure S13.** Photoluminescence decays of each emitter in toluene ( $1.0 \times 10^{-2}$  mg mL<sup>-1</sup>) under N<sub>2</sub> and aerated conditions.

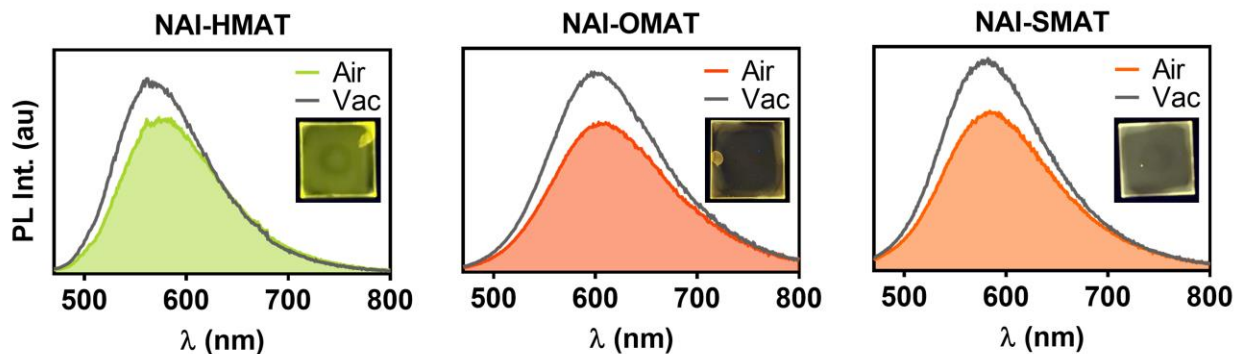

**Figure S14.** Emission spectra of 3 wt% doped PMMA films measured in vacuum and air, with inset photos of films irradiated under 365 nm light.

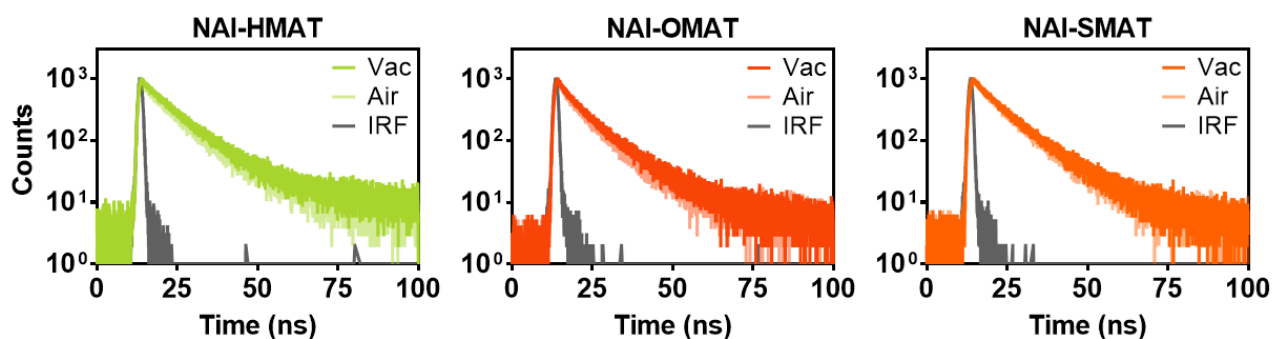

**Figure S15.** Prompt photoluminescence decays of 3 wt% doped PMMA films in vacuum and aerated conditions ( $\lambda_{\text{ex}} = 380 \text{ nm}$ ).

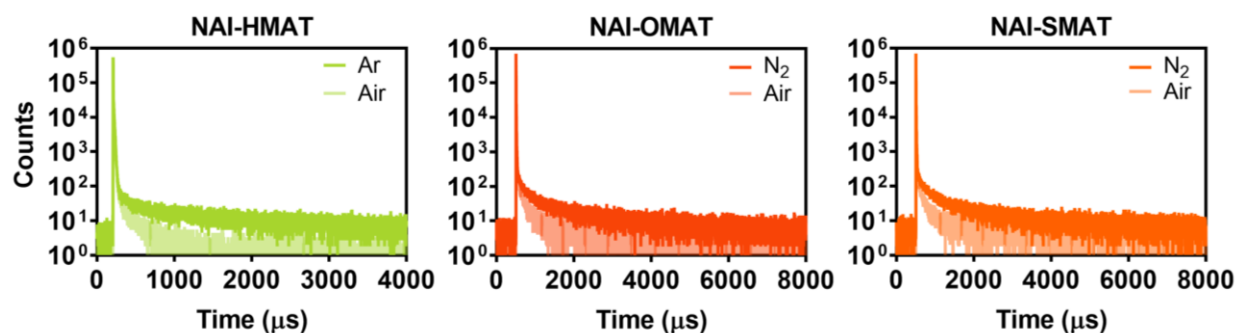

**Figure S16.** Time-resolved PL decay curves of 3 wt% PMMA doped films of all emitters under air and vacuum at 298 K.

**Table S1.** Emission properties of neat powder samples.

| Entry    | Pristine                                |                                         | Ground                                  |                                         | Reversed                                |                                         |
|----------|-----------------------------------------|-----------------------------------------|-----------------------------------------|-----------------------------------------|-----------------------------------------|-----------------------------------------|
|          | $\lambda_{\text{em}}$ (nm) <sup>a</sup> | $\tau_{\text{air}}$ (ns) <sup>a,b</sup> | $\lambda_{\text{em}}$ (nm) <sup>a</sup> | $\tau_{\text{air}}$ (ns) <sup>a,b</sup> | $\lambda_{\text{em}}$ (nm) <sup>a</sup> | $\tau_{\text{air}}$ (ns) <sup>a,b</sup> |
| NAI-HMAT | 580                                     | 6.0                                     | 604                                     | 11.6                                    | 574                                     | 5.8                                     |
| NAI-OMAT | 575                                     | 6.6                                     | 650                                     | 10.3                                    | 594                                     | 7.6                                     |
| NAI-SMAT | 566                                     | 7.3                                     | 649                                     | 10.1                                    | 564                                     | 6.8                                     |

<sup>a</sup> Measured at 298 K under air. <sup>b</sup> Excited using pulsed LED excitation at 380 nm, monitored at the emission maximum.

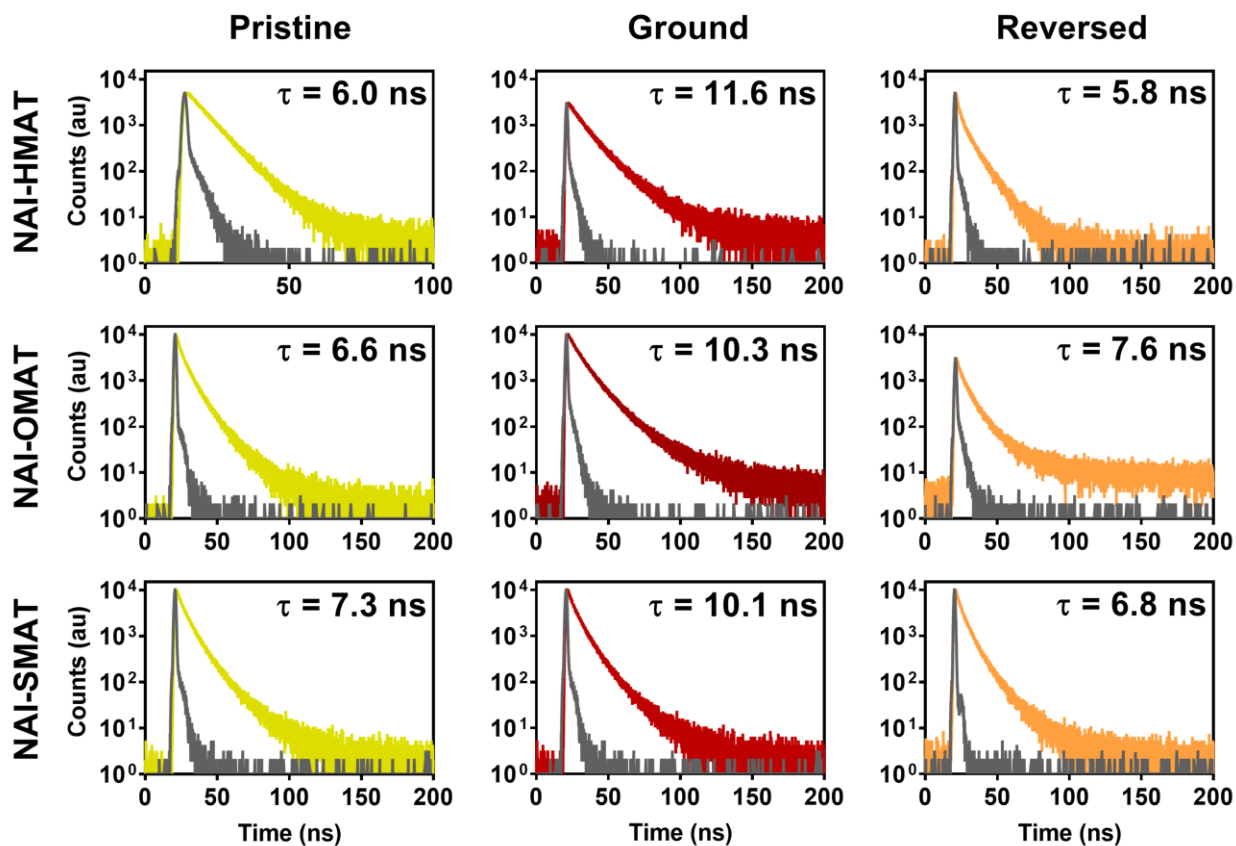**Figure S17.** Time-resolved PL decay curves of 3 wt% PMMA doped films of all emitters under air and vacuum at 298 K.

## X-ray Crystallography

**Table S2.** X-ray crystallographic data for **SMAT-TRZ**, **SOMAT-TRZ**, **SO<sub>2</sub>MAT-TRZ**, **PTZO-TRZ**, and **PTZO<sub>2</sub>-TRZ**.

|                                             | NAI-HMAT                                                        |                                  | NAI-HMAT |
|---------------------------------------------|-----------------------------------------------------------------|----------------------------------|----------|
| <b>Formula</b>                              | C <sub>52.5</sub> H <sub>48</sub> N <sub>2</sub> O <sub>2</sub> | <b>Z'</b>                        | 1        |
| <b>D<sub>calc.</sub>/ g cm<sup>-3</sup></b> | 1.301                                                           | <b>Wavelength/Å</b>              | 0.71073  |
| <b>□/mm<sup>-1</sup></b>                    | 0.078                                                           | <b>Radiation type</b>            | MoKα     |
| <b>Formula Weight</b>                       | 738.93                                                          | <b>Θ<sub>min</sub>/°</b>         | 1.488    |
| <b>Colour</b>                               | orange                                                          | <b>Θ<sub>max</sub>/°</b>         | 27.917   |
| <b>Shape</b>                                | irregular-shaped                                                | <b>Measured Refl's.</b>          | 53394    |
| <b>Size/mm<sup>3</sup></b>                  | 0.32×0.21×0.20                                                  | <b>Indep't Refl's</b>            | 8984     |
| <b>T/K</b>                                  | 100(2)                                                          | <b>Refl's I≥2 □(I)</b>           | 7318     |
| <b>Crystal System</b>                       | monoclinic                                                      | <b>R<sub>int</sub></b>           | 0.0323   |
| <b>Space Group</b>                          | P2 <sub>1</sub> /n                                              | <b>Parameters</b>                | 793      |
| <b>a/Å</b>                                  | 9.8194(12)                                                      | <b>Restraints</b>                | 2317     |
| <b>b/Å</b>                                  | 17.511(2)                                                       | <b>Largest Peak</b>              | 0.794    |
| <b>c/Å</b>                                  | 22.118(3)                                                       | <b>Deepest Hole</b>              | -0.907   |
| <b>α/°</b>                                  | 90                                                              | <b>GooF</b>                      | 1.101    |
| <b>β/°</b>                                  | 97.445(2)                                                       | <b>wR<sub>2</sub> (all data)</b> | 0.1649   |
| <b>γ/°</b>                                  | 90                                                              | <b>wR<sub>2</sub></b>            | 0.1568   |
| <b>V/Å<sup>3</sup></b>                      | 3771.2(8)                                                       | <b>R<sub>I</sub> (all data)</b>  | 0.0848   |
| <b>Z</b>                                    | 4                                                               | <b>R<sub>I</sub></b>             | 0.0691   |

**Crystal Data for NAI-HMAT.** C<sub>52.5</sub>H<sub>48</sub>N<sub>2</sub>O<sub>2</sub>,  $M_r = 738.93$ , monoclinic,  $P2_1/n$  (No. 14),  $a = 9.8194(12)$  Å,  $b = 17.511(2)$  Å,  $c = 22.118(3)$  Å,  $\beta = 97.445(2)^\circ$ ,  $\alpha = \gamma = 90^\circ$ ,  $V = 3771.2(8)$  Å<sup>3</sup>,  $T = 100(2)$  K,  $Z = 4$ ,  $Z' = 1$ ,  $\mu(\text{MoK}\alpha) = 0.078$ , 53394 reflections measured, 8984 unique ( $R_{\text{int}} = 0.0323$ ) which were used in all calculations. The final  $wR_2$  was 0.1649 (all data) and  $R_I$  was 0.0691 ( $I \geq 2\sigma(I)$ ).

An orange irregular-shaped-shaped crystal with dimensions  $0.32 \times 0.21 \times 0.20$  mm<sup>3</sup> was mounted on a MITIGEN holder in oil. Data were collected using a Bruker APEX II area detector diffractometer operating at  $T = 100(2)$  K.

Data were measured using  $\phi$  and  $\omega$  scans of  $0.5^\circ$  per frame for 20 s using MoK $\alpha$  radiation (microfocus sealed X-ray tube, 50 kV, 0.99 mA). The total number of runs and images was based on the strategy calculation from the program APEX4. The maximum resolution that was achieved was  $\Theta = 27.917^\circ$  ( $0.76$  Å).

The unit cell was refined using SAINT V8.40B on 9848 reflections, 18% of the observed reflections. Data reduction, scaling and absorption corrections were performed using SAINT V8.40B. The final completeness is 99.60 % out to  $27.917^\circ$  in  $\Theta$ .

SADABS-2016/2 was used for absorption correction.<sup>5</sup>  $wR_2(\text{int})$  was 0.0463 before and 0.0432 after correction. The ratio of minimum to maximum transmission is 0.9512. The  $\lambda/2$  correction factor is not present. The absorption coefficient  $\mu$  of this material is  $0.078$  mm<sup>-1</sup> at this wavelength ( $\lambda =$

0.71073Å) and the minimum and maximum transmissions are 0.936 and 0.985.

The structure was solved and the space group  $P2_1/n$  (# 14) determined by the XT structure solution program using Intrinsic Phasing methods and refined by full matrix least squares minimisation on  $F^2$  using version 2018/3 of XL (Sheldrick, 2015).<sup>6,7</sup> The material crystallizes with disorder and refinements were carried out with restraints designed to maintain similar geometries between the two disordered fragments. The minor disordered fragment has an occupancy of ~11%. Finally, solvent toluene is found in the lattice, residing on an inversion center. A rigid group was used to model this solvent molecule. All non-hydrogen atoms were refined anisotropically. Hydrogen atom positions were calculated geometrically and refined using the riding model.

**Powder X-ray diffraction** patterns of each pristine, ground, and reversed sample were collected on a Malvern-Panalytical Empyrean 3 diffractometer using a Bragg-Brentano configuration. The compounds were not ground prior to collection of the diffraction pattern and were treated gently to not induce mechanical changes prior to measurement. The first powders were loosely packed into a steel sample holder with a 16 mm diameter well. Subsequent powders were gently packed into the shallow well of zero background Si substrates. Data was collected using Cu  $K_\alpha$  radiation and scanned from  $2\Theta = 5^\circ$ – $90^\circ$ . Due to the non-ideal nature of the sample, additional data were collected on each sample using (1) a parallel beam configuration to verify the peak positions and (2) using an area detector to inspect the diffraction rings and confirm their uniformity. Instrument details are provided in Table S3 below. In each case, the Bragg-Brentano scan was plotted in the manuscript.

**Table S3.** Instrument details for powder X-ray diffraction scans.

|                               |                                               |                                 |                                 |
|-------------------------------|-----------------------------------------------|---------------------------------|---------------------------------|
| <b>Instrument Type</b>        | Malvern-Panalytical Empyrean 3                |                                 |                                 |
| <b>Configuration</b>          | Bragg-Brentano                                | Gonio scan with 2D detection    | parallel beam                   |
| <b>Tube</b>                   | Cu LFF HR @ 45kV, 40mA                        |                                 |                                 |
| <b>Incident Beam Optics</b>   | iCore                                         |                                 |                                 |
| <b>Divergence Slit</b>        | Fixed, $1/4^\circ$                            | Fixed, $1/2^\circ$              | Fixed, $1/16^\circ$             |
| <b>Masks</b>                  | 14mm primary / 6mm secondary                  |                                 |                                 |
| <b>Soller Slits</b>           | 0.03rad                                       |                                 |                                 |
| <b>Filtration</b>             | Bragg-Brentano <sup>HD</sup> (BBHD mirror)    |                                 |                                 |
| <b>Sample Stage</b>           | Reflection/Transmission spinner – spinning on |                                 |                                 |
| <b>Accessory</b>              | Sample Changer                                |                                 |                                 |
| <b>Diffracted Beam Optics</b> | dCore                                         |                                 |                                 |
| <b>Soller Slits</b>           | 0.04rad                                       | none                            | none                            |
| <b>Anti-scatter slit</b>      | Fixed, $1/4^\circ$                            | Fixed, $4^\circ$                | open                            |
| <b>Collimator</b>             | none                                          | none                            | $0.11^\circ$ parallel plate     |
| <b>Detector</b>               | PIXcel <sup>3D</sup> in 1D mode               | PIXcel <sup>3D</sup> in 2D mode | PIXcel <sup>3D</sup> in 0D mode |

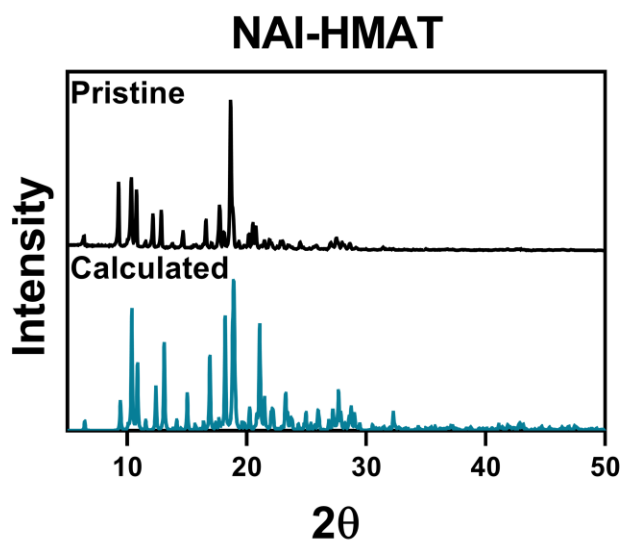

**Figure S18.** Experimental and calculated powder X-ray diffraction patterns for NAI-HMAT. The calculated pattern was generated from the single crystal data using the program Mercury (CCDC).



## Thermal and Electrochemical Characterization

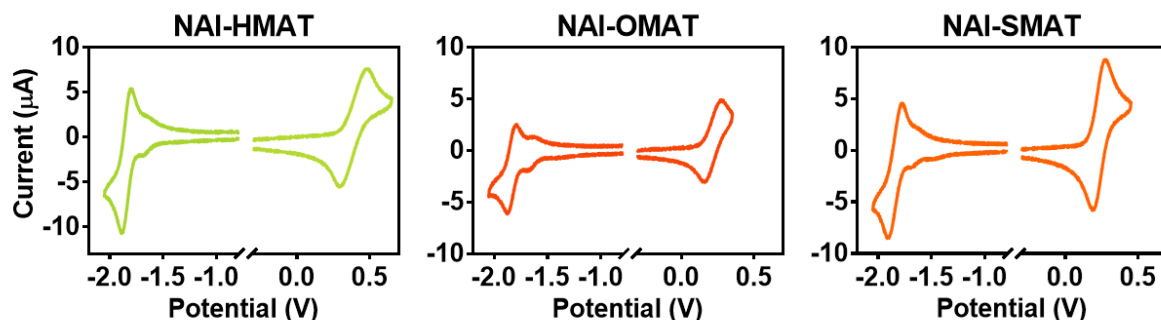

**Figure S19.** Cyclic voltammograms measured at  $1 \mu\text{mol mL}^{-1}$  in degassed *o*-difluorobenzene relative to  $\text{Fc}^{0/+}$ , with  $0.2 \text{ M } [n\text{-Bu}_4\text{N}^+][\text{PF}_6^-]$  at  $50 \text{ mV s}^{-1}$ . Each sample was run with three cycles, with the third cycle shown in each case.

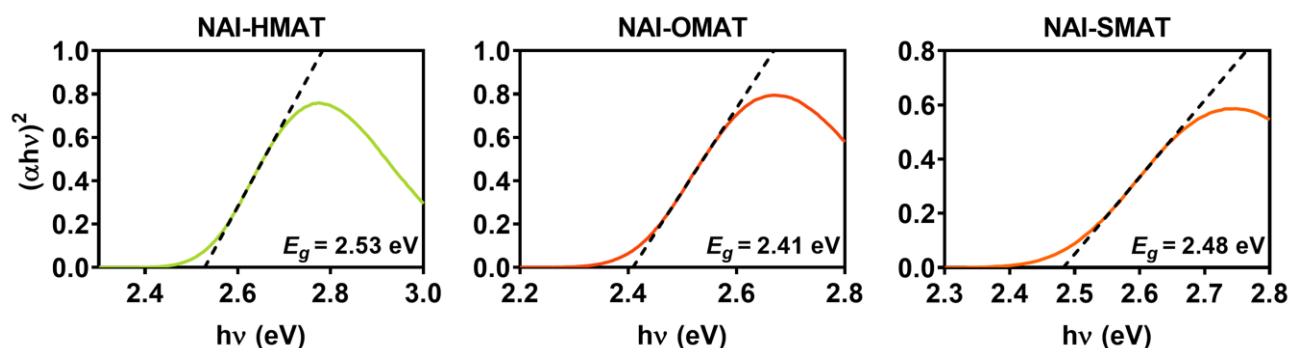

**Figure S20.** Tauc plots determined using absorption spectra measured in toluene, with calculated optical gaps ( $E_g$ ) displayed inset.

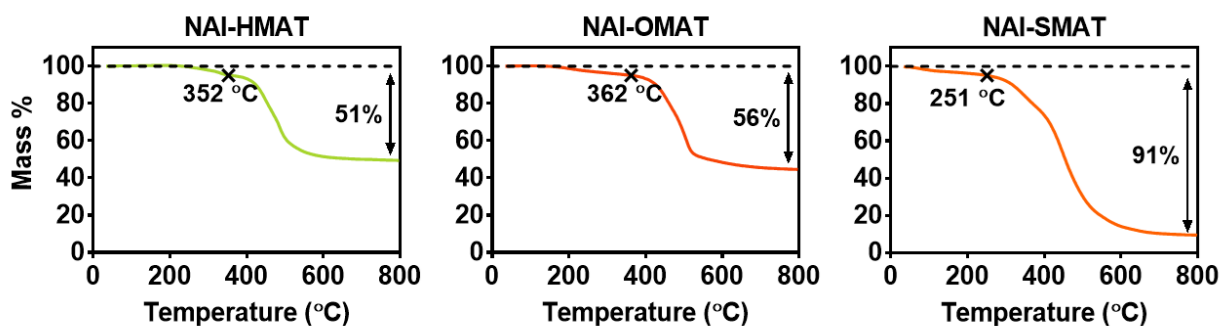

**Figure S21.** Thermogravimetric analysis (TGA) performed at a rate of  $10 \text{ }^\circ\text{C min}^{-1}$ , under a  $50 \text{ mL min}^{-1}$  flow of nitrogen gas, from 30 to  $800 \text{ }^\circ\text{C}$ .

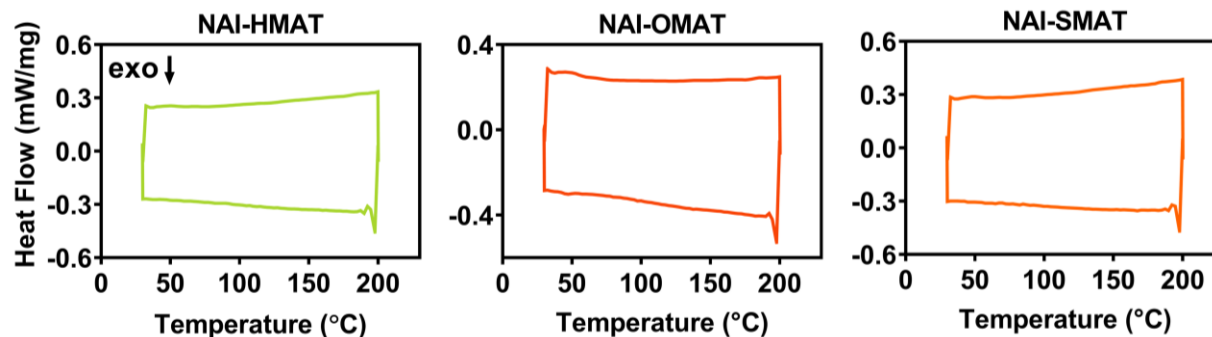

**Figure S22.** Differential scanning calorimetry (DSC) traces acquired at a rate of 10 °C min<sup>-1</sup>, under a 50 mL min<sup>-1</sup> flow of nitrogen gas. Two consecutive heating and cooling cycles were performed, with the first heating cycle shown in (A) and the second heating and cooling cycle shown in (B).

## Density Functional Theory

**Table S4.** Results of DFT and TDA-DFT calculations.

| Entry    | HOMO <sup>a</sup><br>(eV) | LUMO <sup>a</sup><br>(eV) | $E_{\text{gap}}$<br>(eV) | $E_{\text{S1}}$ <sup>b</sup><br>(eV) | $f^b$<br>(S <sub>0</sub> →S <sub>1</sub> ) | # Imag.<br>Freq. | $E_{\text{Total}}$<br>(10 <sup>3</sup> Hartrees) |
|----------|---------------------------|---------------------------|--------------------------|--------------------------------------|--------------------------------------------|------------------|--------------------------------------------------|
| NAI-HMAT | -5.17                     | -2.69                     | 2.49                     | 2.13                                 | 0.2288                                     | 0                | -2.154                                           |
| NAI-OMAT | -5.04                     | -2.70                     | 2.34                     | 1.99                                 | 0.2258                                     | 0                | -2.111                                           |
| NAI-SMAT | -5.24                     | -2.72                     | 2.52                     | 2.17                                 | 0.2075                                     | 0                | -2.434                                           |

<sup>a</sup> Calculated at the B3LYP/6-31+g(d) level. <sup>b</sup> Calculated using TDA-DFT at the B3LYP/6-31+g(d) level in toluene using a polarized continuum model.

**Table S5.** Cartesian coordinates [Å] of the optimized structure for **NAI-HMAT**.

|   | X        | Y        | Z        |   | X         | Y         | Z         |   | X         | Y         | Z         |
|---|----------|----------|----------|---|-----------|-----------|-----------|---|-----------|-----------|-----------|
| C | 3.025026 | -2.02936 | -2.14014 | C | -5.454361 | 2.504036  | -0.251681 | H | -9.021609 | -2.617023 | 0.413621  |
| C | 1.629957 | -2.10362 | -2.31797 | C | -3.949629 | 2.710296  | -0.249275 | H | -9.310955 | 2.275444  | -0.320117 |
| C | 0.784103 | -1.30991 | -1.56735 | C | -7.337208 | -1.299597 | 0.265304  | H | -8.225916 | 4.476371  | -0.616210 |
| C | 1.292336 | -0.40606 | -0.59577 | C | -8.265677 | -0.115638 | 0.060134  | H | -5.757682 | 4.601810  | -0.572057 |
| C | 2.713235 | -0.30341 | -0.45252 | C | -7.483590 | 1.175142  | -0.107400 | H | -3.571366 | -2.249335 | 2.731641  |
| C | 3.561256 | -1.13709 | -1.22809 | C | -5.817142 | -3.593424 | 0.663559  | H | -3.581452 | -3.915479 | 2.126793  |
| C | 0.450319 | 0.431392 | 0.211135 | C | -7.199020 | -3.704549 | 0.636935  | H | -2.107387 | -2.946447 | 2.013938  |
| C | 1.041551 | 1.358449 | 1.062082 | C | -7.939576 | -2.549603 | 0.436850  | H | -2.018891 | -3.384153 | -0.540687 |
| C | 2.437102 | 1.46744  | 1.180925 | C | -8.228811 | 2.342284  | -0.300434 | H | -3.494173 | -4.347407 | -0.435936 |
| C | 3.270028 | 0.639268 | 0.448485 | C | -7.629394 | 3.581212  | -0.467910 | H | -3.419989 | -2.969866 | -1.548052 |
| C | 4.735819 | 0.757303 | 0.61291  | C | -6.244355 | 3.641592  | -0.441118 | H | -3.870237 | 3.281033  | 1.862171  |
| N | 5.526899 | -0.11275 | -0.16312 | C | -3.198468 | -2.907805 | 1.940393  | H | -2.494807 | 3.878259  | 0.914794  |
| C | 5.035011 | -1.05804 | -1.08225 | C | -3.111699 | -3.330433 | -0.561088 | H | -4.072540 | 4.657772  | 0.764262  |
| C | 9.068936 | 0.935575 | -0.66847 | C | -3.573006 | 3.693125  | 0.892309  | H | -4.017201 | 4.263522  | -1.803604 |
| C | 7.688154 | 0.850034 | -0.81966 | C | -3.518855 | 3.307933  | -1.616332 | H | -2.439403 | 3.483320  | -1.649526 |
| C | 6.960013 | -0.01894 | -0.01123 | C | 11.853972 | -0.626236 | 1.506414  | H | -3.779112 | 2.622524  | -2.429534 |
| C | 7.609006 | -0.79488 | 0.939819 | C | 11.940261 | -0.085218 | -0.929958 | H | 12.941021 | -0.496901 | 1.558413  |
| C | 8.995186 | -0.70152 | 1.083616 | C | 11.640367 | 1.751195  | 0.772827  | H | 11.444591 | -0.389045 | 2.495143  |
| C | 9.754857 | 0.163419 | 0.28503  | C | -9.197594 | 0.014965  | 1.295567  | H | 11.656008 | -1.683384 | 1.295025  |
| O | 5.802781 | -1.76711 | -1.71735 | C | -9.119238 | -0.357741 | -1.214401 | H | 13.031340 | 0.000299  | -0.853462 |
| O | 5.25802  | 1.558363 | 1.375578 | H | 3.699853  | -2.650915 | -2.719346 | H | 11.609081 | 0.568995  | -1.743103 |
| C | 11.27894 | 0.292181 | 0.414619 | H | 1.218237  | -2.783570 | -3.058048 | H | 11.694774 | -1.116365 | -1.208506 |
| C | -1.02477 | 0.327095 | 0.165571 | H | -0.286300 | -1.361240 | -1.730312 | H | 11.178580 | 2.044591  | 1.722454  |
| C | -1.68786 | -0.88655 | 0.339213 | H | 0.404732  | 1.986475  | 1.678154  | H | 12.727683 | 1.859759  | 0.870678  |
| C | -3.07733 | -0.99669 | 0.332758 | H | 2.883082  | 2.184786  | 1.862117  | H | 11.301271 | 2.453830  | 0.004586  |
| C | -3.8751  | 0.15615  | 0.139106 | H | 9.618446  | 1.619234  | -1.308570 | H | -8.606195 | 0.185730  | 2.201028  |
| C | -3.218   | 1.397759 | -0.0307  | H | 7.173189  | 1.453604  | -1.561180 | H | -9.893145 | 0.851325  | 1.179580  |
| C | -1.82438 | 1.454476 | -0.00813 | H | 7.034185  | -1.470233 | 1.566632  | H | -9.790472 | -0.892756 | 1.441460  |
| C | -3.64921 | -2.38665 | 0.548895 | H | 9.476069  | -1.318494 | 1.833614  | H | -9.813230 | 0.469899  | -1.388359 |
| C | -5.16676 | -2.36772 | 0.494346 | H | -1.095115 | -1.776984 | 0.513101  | H | -8.472275 | -0.451185 | -2.092762 |
| C | -5.92768 | -1.19305 | 0.291072 | H | -1.336113 | 2.411488  | -0.154215 | H | -9.709672 | -1.274550 | -1.126415 |
| N | -5.28913 | 0.069028 | 0.117604 | H | -5.221146 | -4.485527 | 0.821688  |   |           |           |           |
| C | -6.07183 | 1.243544 | -0.07928 | H | -7.685974 | -4.666018 | 0.769554  |   |           |           |           |

**Table S6.** Cartesian coordinates [ $\text{\AA}$ ] of the optimized structure for **NAI-OMAT**.

|   | X         | Y         | Z         |   | X         | Y         | Z         |   | X         | Y         | Z         |
|---|-----------|-----------|-----------|---|-----------|-----------|-----------|---|-----------|-----------|-----------|
| C | 2.610338  | -2.024779 | -2.147654 | C | -6.314753 | -1.195490 | 0.293711  | H | -1.499178 | -1.792777 | 0.509953  |
| C | 1.215506  | -2.100754 | -2.326492 | N | -5.668299 | 0.050816  | 0.122548  | H | -1.750666 | 2.404683  | -0.150144 |
| C | 0.367937  | -1.311191 | -1.573410 | C | -6.462424 | 1.205481  | -0.069025 | H | -5.765873 | -4.506610 | 0.816919  |
| C | 0.873898  | -0.409995 | -0.598197 | C | -5.901986 | 2.477660  | -0.243560 | H | -8.231728 | -4.564066 | 0.754779  |
| C | 2.294631  | -0.304987 | -0.454435 | C | -4.395395 | 2.701311  | -0.244153 | H | -9.497573 | -2.415257 | 0.391255  |
| C | 3.144473  | -1.134589 | -1.232380 | C | -7.721109 | -1.251153 | 0.263436  | H | -9.769630 | 2.010504  | -0.273007 |
| C | 0.029979  | 0.423147  | 0.211515  | O | -8.493399 | -0.130520 | 0.071858  | H | -8.776397 | 4.305795  | -0.584673 |
| C | 0.619750  | 1.349130  | 1.064864  | C | -7.864488 | 1.081211  | -0.087501 | H | -6.322772 | 4.563111  | -0.562600 |
| C | 2.015008  | 1.460844  | 1.183741  | C | -6.315523 | -3.585097 | 0.658917  | H | -4.001815 | -2.289700 | 2.732033  |
| C | 2.849605  | 0.636242  | 0.449177  | C | -7.703369 | -3.624564 | 0.625789  | H | -4.033775 | -3.952021 | 2.115410  |
| C | 4.315161  | 0.756847  | 0.614025  | C | -8.413310 | -2.440867 | 0.425189  | H | -2.547208 | -3.000104 | 2.007436  |
| N | 5.108084  | -0.109431 | -0.164283 | C | -8.696958 | 2.174188  | -0.269389 | H | -2.464866 | -3.429534 | -0.540575 |
| C | 4.618136  | -1.053276 | -1.085834 | C | -8.137259 | 3.440106  | -0.441306 | H | -3.952847 | -4.375449 | -0.434688 |
| C | 8.648069  | 0.946672  | -0.667732 | C | -6.755354 | 3.577818  | -0.427340 | H | -3.860712 | -3.000217 | -1.549609 |
| C | 7.267471  | 0.858642  | -0.819153 | C | -3.638003 | -2.947688 | 1.936273  | H | -4.319955 | 3.275770  | 1.866875  |
| C | 6.541037  | -0.013042 | -0.012115 | C | -3.557155 | -3.363468 | -0.562256 | H | -2.957733 | 3.892922  | 0.912452  |
| C | 7.191473  | -0.789185 | 0.937776  | C | -4.033012 | 3.690140  | 0.894974  | H | -4.549887 | 4.645653  | 0.764611  |
| C | 8.577449  | -0.693277 | 1.081819  | C | -3.979760 | 3.308868  | -1.609977 | H | -2.903250 | 3.502262  | -1.643988 |
| C | 9.335457  | 0.174404  | 0.284622  | C | 11.436023 | -0.612993 | 1.504939  | H | -4.230444 | 2.622945  | -2.425641 |
| O | 5.387139  | -1.759436 | -1.722602 | C | 11.521448 | -0.067861 | -0.930568 | H | -4.495279 | 4.257016  | -1.790236 |
| O | 4.835449  | 1.556990  | 1.378928  | C | 11.217677 | 1.765201  | 0.775159  | H | 12.522792 | -0.481523 | 1.557288  |
| C | 10.859266 | 0.306028  | 0.414568  | H | 3.286556  | -2.643099 | -2.728690 | H | 11.026052 | -0.378248 | 2.494008  |
| C | -1.445218 | 0.315663  | 0.166345  | H | 0.805362  | -2.778484 | -3.069478 | H | 11.240262 | -1.670201 | 1.291800  |
| C | -2.099766 | -0.906387 | 0.339331  | H | -0.702225 | -1.363611 | -1.737712 | H | 12.612334 | 0.019733  | -0.853820 |
| C | -3.487987 | -1.022958 | 0.334641  | H | -0.018032 | 1.973722  | 1.683447  | H | 11.189044 | 0.587010  | -1.742682 |
| C | -4.270659 | 0.140022  | 0.142561  | H | 2.459530  | 2.177126  | 1.867000  | H | 11.278079 | -1.099049 | -1.210812 |
| C | -3.635610 | 1.392553  | -0.027704 | H | 9.196279  | 1.632383  | -1.306748 | H | 10.755177 | 2.056158  | 1.725189  |
| C | -2.242675 | 1.448785  | -0.005787 | H | 6.751365  | 1.462312  | -1.559801 | H | 12.304751 | 1.875789  | 0.873344  |
| C | -4.081685 | -2.415326 | 0.548193  | H | 6.617957  | -1.466637 | 1.563524  | H | 10.877302 | 2.468380  | 0.007982  |
| C | -5.603416 | -2.385735 | 0.495299  | H | 9.059505  | -1.310442 | 1.830903  |   |           |           |           |

**Table S7.** Cartesian coordinates [ $\text{\AA}$ ] of the optimized structure for **NAI-SMAT**.

|   | X         | Y         | Z         |   | X         | Y         | Z         |   | X         | Y         | Z         |
|---|-----------|-----------|-----------|---|-----------|-----------|-----------|---|-----------|-----------|-----------|
| C | 2.747432  | -2.059274 | -2.095281 | C | -6.115410 | -1.236978 | 0.199925  | H | -1.314974 | -1.741900 | 0.685099  |
| C | 1.348956  | -2.140052 | -2.241053 | N | -5.493516 | 0.027295  | -0.046499 | H | -1.579083 | 2.438794  | -0.017783 |
| C | 0.517591  | -1.331121 | -1.490638 | C | -6.273792 | 1.216181  | -0.199112 | H | -5.521097 | -4.307485 | 1.544372  |
| C | 1.044763  | -0.404276 | -0.551227 | C | -5.709704 | 2.495892  | -0.036328 | H | -7.953685 | -4.558771 | 1.206364  |
| C | 2.468221  | -0.297728 | -0.439267 | C | -4.210306 | 2.728892  | 0.043568  | H | -9.198224 | -2.720277 | 0.040395  |
| C | 3.301220  | -1.146704 | -1.214451 | C | -7.477173 | -1.458098 | -0.111818 | H | -9.514642 | 2.174856  | -0.752968 |
| C | 0.218881  | 0.450291  | 0.254327  | S | -8.368790 | -0.336346 | -1.141453 | H | -8.532668 | 4.428328  | -0.256752 |
| C | 0.826674  | 1.391586  | 1.077404  | C | -7.646155 | 1.155044  | -0.535523 | H | -6.094362 | 4.603510  | 0.086113  |
| C | 2.224267  | 1.502968  | 1.166304  | C | -6.083547 | -3.490761 | 1.105401  | H | -3.871666 | -1.794092 | 3.002211  |
| C | 3.042481  | 0.662432  | 0.431707  | C | -7.446991 | -3.647310 | 0.904351  | H | -3.870792 | -3.542675 | 2.705565  |
| C | 4.511569  | 0.784756  | 0.563735  | C | -8.141068 | -2.622702 | 0.268603  | H | -2.391233 | -2.605603 | 2.459794  |
| N | 5.287568  | -0.096048 | -0.214794 | C | -8.458173 | 2.287445  | -0.528528 | H | -3.600979 | -3.274560 | -1.071550 |
| C | 4.777707  | -1.063215 | -1.100941 | C | -7.910093 | 3.538930  | -0.265558 | H | -2.234892 | -3.508382 | 0.037563  |
| C | 8.822934  | 0.935835  | -0.820945 | C | -6.541618 | 3.625942  | -0.056548 | H | -3.724808 | -4.425738 | 0.269736  |
| C | 7.434353  | 0.844063  | -0.940009 | C | -3.480043 | -2.583463 | 2.352494  | H | -2.788520 | 3.703518  | 1.401730  |
| C | 6.723508  | 0.002397  | -0.094946 | C | -3.325706 | -3.451573 | -0.026697 | H | -4.377871 | 4.475996  | 1.368014  |
| C | 7.392048  | -0.748130 | 0.868662  | C | -3.863871 | 3.510524  | 1.338550  | H | -4.161351 | 2.936799  | 2.222279  |
| C | 8.775823  | -0.649224 | 0.979255  | C | -3.783847 | 3.559041  | -1.196912 | H | -4.016307 | 3.014880  | -2.117934 |
| C | 9.523617  | 0.193482  | 0.138760  | C | 11.656457 | -1.133515 | 0.072822  | H | -4.309547 | 4.517787  | -1.225394 |
| O | 5.532740  | -1.786345 | -1.735172 | C | 11.695413 | 1.239238  | -0.704592 | H | -2.710342 | 3.769638  | -1.184404 |
| O | 5.047507  | 1.598733  | 1.302708  | C | 11.389678 | 0.752943  | 1.725727  | H | 12.747456 | -1.096103 | 0.181924  |
| C | 11.048403 | 0.268985  | 0.298483  | H | 3.410910  | -2.692406 | -2.675051 | H | 11.272579 | -1.863311 | 0.793180  |
| C | -1.257110 | 0.344710  | 0.236169  | H | 0.922916  | -2.837651 | -2.956142 | H | 11.423826 | -1.501310 | -0.933022 |
| C | -1.912935 | -0.866887 | 0.457484  | H | -0.556034 | -1.389608 | -1.628082 | H | 12.780193 | 1.256422  | -0.549548 |
| C | -3.301667 | -0.982919 | 0.452582  | H | 0.203048  | 2.030345  | 1.695879  | H | 11.326386 | 2.263366  | -0.576454 |
| C | -4.094700 | 0.151006  | 0.157645  | H | 2.683497  | 2.232356  | 1.825523  | H | 11.513896 | 0.933750  | -1.741488 |
| C | -3.455162 | 1.408742  | 0.068486  | H | 9.352862  | 1.600141  | -1.493448 | H | 10.998503 | 0.072821  | 2.489470  |
| C | -2.061470 | 1.473543  | 0.089018  | H | 6.905868  | 1.425929  | -1.689355 | H | 12.477308 | 0.813958  | 1.855813  |
| C | -3.886101 | -2.321359 | 0.877971  | H | 6.828839  | -1.403923 | 1.526007  | H | 10.964796 | 1.745866  | 1.911997  |
| C | -5.399987 | -2.317746 | 0.750130  | H | 9.278308  | -1.242566 | 1.737219  |   |           |           |           |

## References

- 1 A. H. Balawi, S. Stappert, J. Gorenflot, C. Li, K. Müllen, D. Andrienko and F. Laquai, *J. Phys. Chem. C*, 2019, **123**, 16602–16613.
- 2 Z. Fang, T. L. Teo, L. Cai, Y. H. Lal, A. Samoc and M. Samoc, *Org. Lett.*, 2009, **11**, 1–4.
- 3 S. Kataoka, S. Suzuki, Y. Shiota, K. Yoshizawa, T. Matsumoto, M. S. Asano, T. Yoshihara, C. Kitamura and S. I. Kato, *J. Org. Chem.*, 2021, **86**, 12559–12568.
- 4 J. Zhou, P. Chen, X. Wang, Y. Wang, Y. Wang, F. Li, M. Yang, Y. Huang, J. Yu and Z. Lu, *Chem. Commun.*, 2014, **50**, 7586–7589.
- 5 L. Krause, R. Herbst-Irmer, G. M. Sheldrick and D. Stalke, *J. Appl. Crystallogr.*, 2015, **48**, 3–10.
- 6 G. M. Sheldrick, *Acta Crystallogr. Sect. A*, 2015, **A71**, 3–8.
- 7 G. M. Sheldrick, *Acta Crystallogr. Sect. C*, 2015, **C71**, 3–8.
